# Supplementary material for: Potent Cas9 Inhibition in Bacterial and Human Cells by AcrIIC4 and AcrIIC5 Anti-CRISPR Proteins
Source: PubMed Central journal article supplement (PMC6282205; doi:10.1128/mbio.02321-18), 2018-12-04

# Supplementary Figure 5

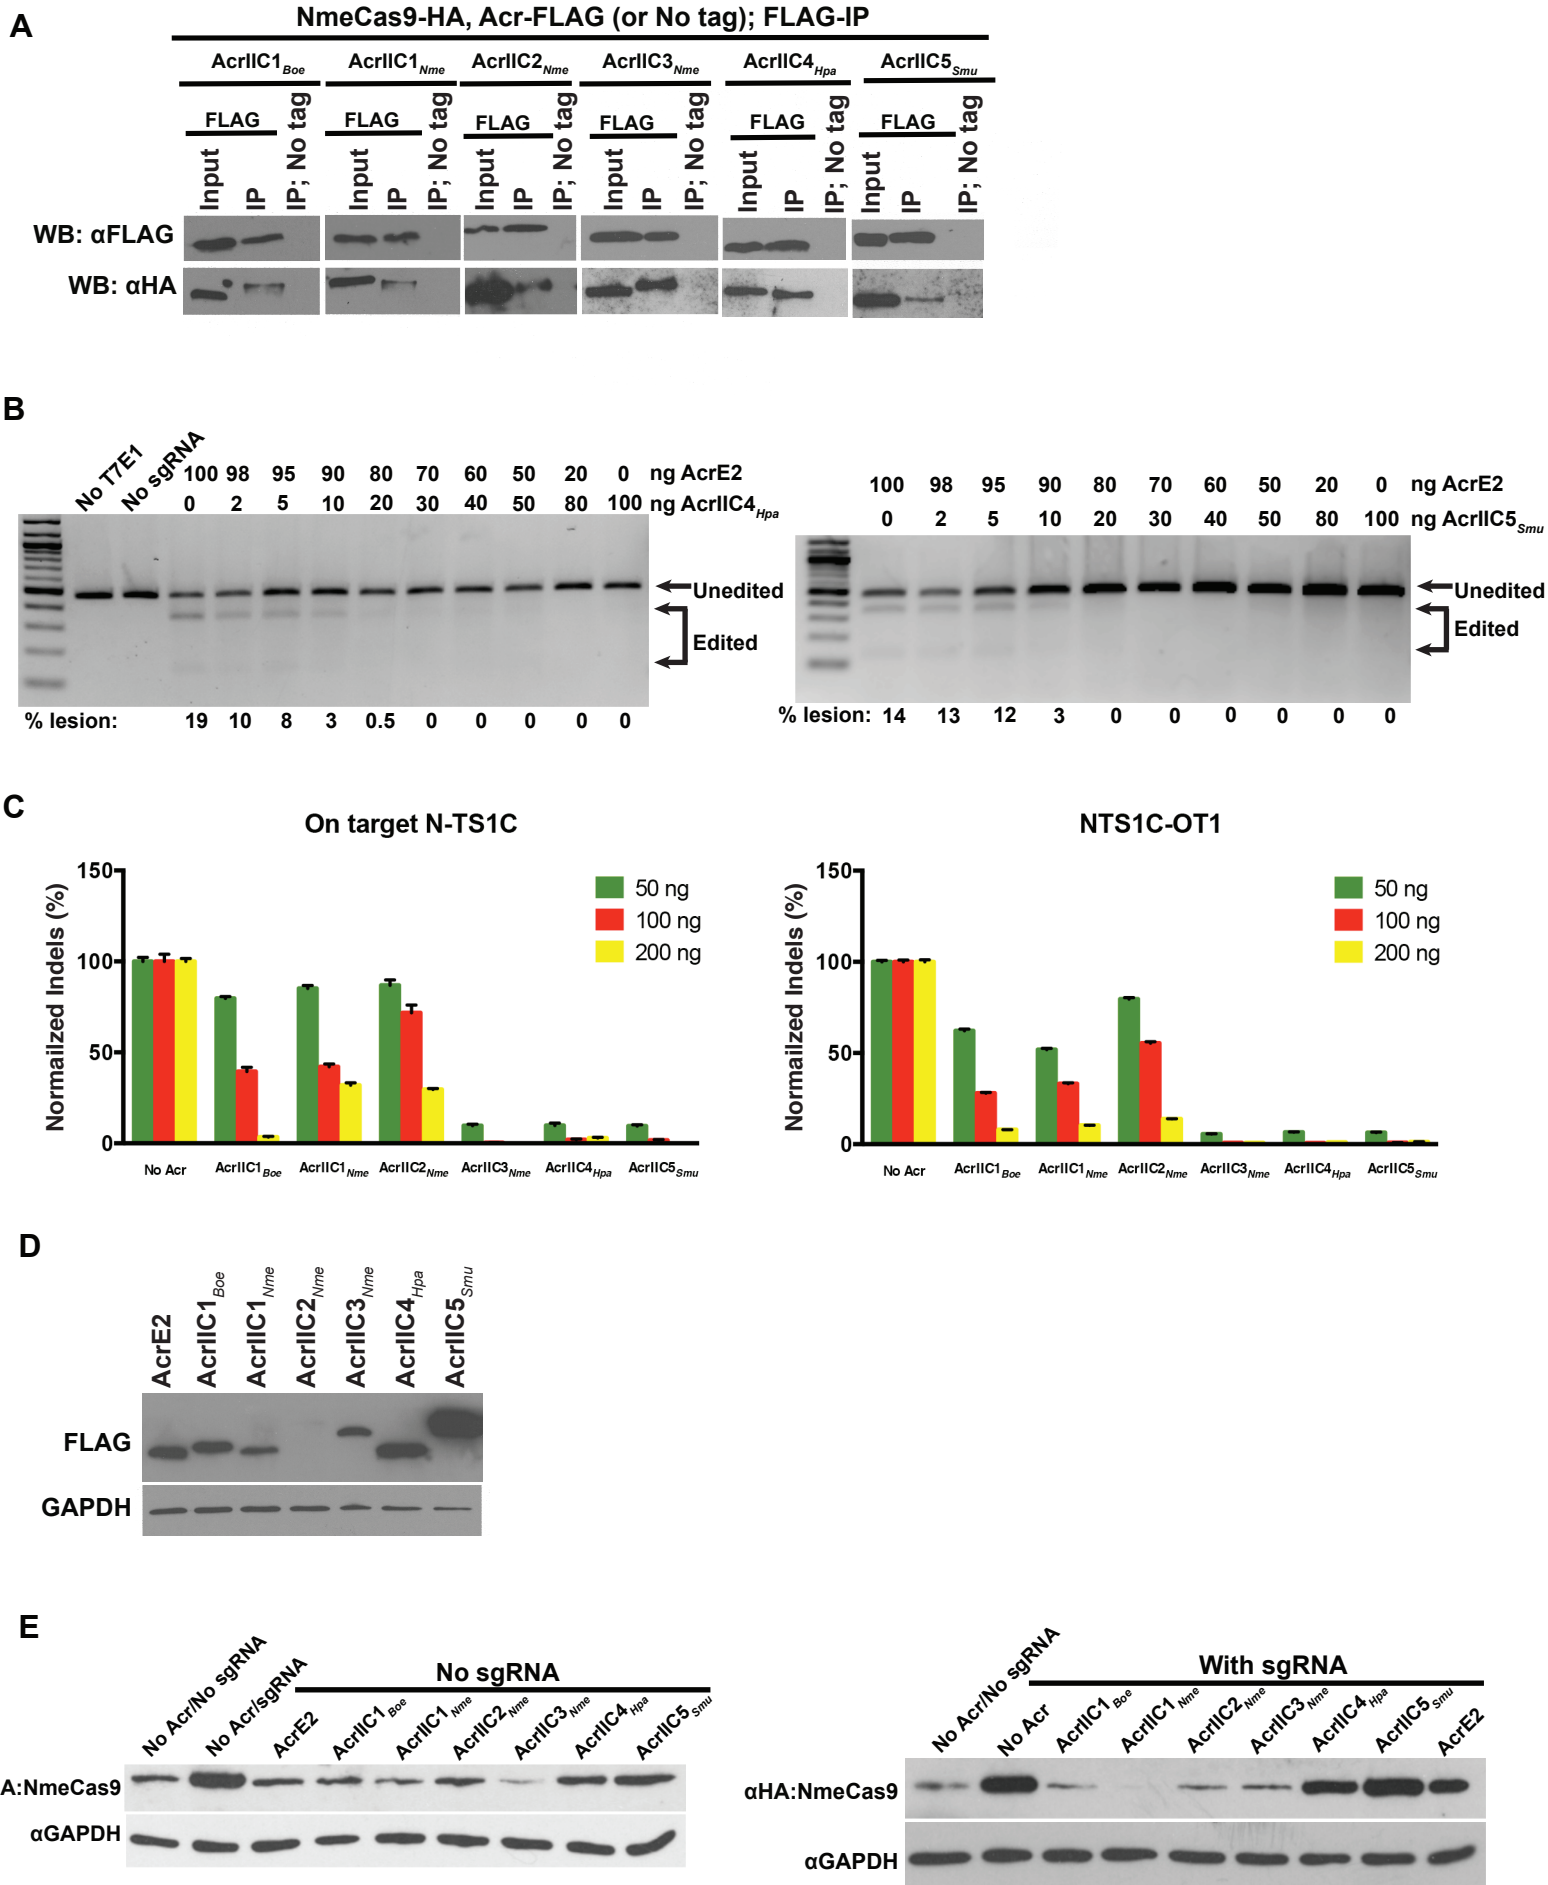

Supplement: mbo006184201sf5.pdf [file mbo006184201sf5.pdf]
