# Supplementary material for: Potent Cas9 Inhibition in Bacterial and Human Cells by AcrIIC4 and AcrIIC5 Anti-CRISPR Proteins
Source: PubMed Central journal article supplement (PMC6282205; doi:10.1128/mbio.02321-18), 2018-12-04
Supplement: mbo006184201st1.pdf [file mbo006184201st1.pdf]

**Supplementary Table 1:** DNA and amino acid sequences of newly identified II-C anti-CRISPRs and Cas9 orthologs.

|                        | Nucleotide sequence<br>(5'→3')                                                                                                                                                                                                                                                                                                                                                                                                                                                                                                                                                                                                                                                                                                                                                                                                                                                                                                                                                                                                                                                                                                                                                                                                                                                                                                                                                                                                                                                                                                                                                                                                                                                                                                                                                                                                                                                                                                                                                                                                                                                                                                                                                                                                                                                                                                                                                                                                                                                                                                                                                                                                    | Amino acid sequence<br>(N→C)                                                                                                                                                                                                                                                                                                                                                                                                                                                                                                                                                                                                                                                                                                                                                                                                                                                                                                                                                                                                                          |
|------------------------|-----------------------------------------------------------------------------------------------------------------------------------------------------------------------------------------------------------------------------------------------------------------------------------------------------------------------------------------------------------------------------------------------------------------------------------------------------------------------------------------------------------------------------------------------------------------------------------------------------------------------------------------------------------------------------------------------------------------------------------------------------------------------------------------------------------------------------------------------------------------------------------------------------------------------------------------------------------------------------------------------------------------------------------------------------------------------------------------------------------------------------------------------------------------------------------------------------------------------------------------------------------------------------------------------------------------------------------------------------------------------------------------------------------------------------------------------------------------------------------------------------------------------------------------------------------------------------------------------------------------------------------------------------------------------------------------------------------------------------------------------------------------------------------------------------------------------------------------------------------------------------------------------------------------------------------------------------------------------------------------------------------------------------------------------------------------------------------------------------------------------------------------------------------------------------------------------------------------------------------------------------------------------------------------------------------------------------------------------------------------------------------------------------------------------------------------------------------------------------------------------------------------------------------------------------------------------------------------------------------------------------------|-------------------------------------------------------------------------------------------------------------------------------------------------------------------------------------------------------------------------------------------------------------------------------------------------------------------------------------------------------------------------------------------------------------------------------------------------------------------------------------------------------------------------------------------------------------------------------------------------------------------------------------------------------------------------------------------------------------------------------------------------------------------------------------------------------------------------------------------------------------------------------------------------------------------------------------------------------------------------------------------------------------------------------------------------------|
| AcrIIc4 <sub>Hpa</sub> | ATGAAGATCACCCAGCAGCAACTTCGCGACCATTGCGACCAGCGAGAAC<br>TTTGCGAAGCTGAGCGTGCTGCCGAAAAACCACCGTGAGCCGATCAAG<br>GGTCTGTTCAAAAGCGCGGTTGAACAGTTTAGCAGCGCGCGTGACTTC<br>TTTAAGAACGAGAAGTACAGCAAAGAGCTGGCGGAAAAAGTTCAACAAAG<br>AAGCGGTGAACGAGGCGGTTGAAAAGCTGCAAAAAGCGATCGATCTGG<br>CGGAAAAACAGGGCATTCAATTT                                                                                                                                                                                                                                                                                                                                                                                                                                                                                                                                                                                                                                                                                                                                                                                                                                                                                                                                                                                                                                                                                                                                                                                                                                                                                                                                                                                                                                                                                                                                                                                                                                                                                                                                                                                                                                                                                                                                                                                                                                                                                                                                                                                                                                                                                                                                    | MKITSSNFATIATSENFA<br>KLSVLPKNHREPIKGLFK<br>SAVEQFSSARDFFKNENY<br>SKELAEKFNKEAVNEAV<br>EKLQKAILDLAEKQGIQF                                                                                                                                                                                                                                                                                                                                                                                                                                                                                                                                                                                                                                                                                                                                                                                                                                                                                                                                             |
| AcrIIc5 <sub>Smu</sub> | ATGAACAACAGCATCAAGTTCACGCTGAGCTACGACGGTACCGCGCGT<br>GCGCTGTTTAAACACCAAGGAGCAGGCGGAAAAATACTGCCTGGTTGAG<br>GAAATTAACGATGAGATGAACGGCTATAAGCGTAAAAGCTGGGAGGAA<br>AAGCTGCGTGAGGAAAAGTGCAGGAGCGTGCAGGACTGGGTTGAGAAG<br>AACTACACCAGCAGCTATAGCGACCTGTTCAACATCTGCGAGATTGAAG<br>TGAGCAGCGCGGGTCAACTGGTTAAGATCGACAACACCGAGGTGGACG<br>ATTTCTGTTGAAAAGTGCATGCTTTACCCTGGAGGACGATCTGGAGG<br>AATTCACAACAGGCGAAAACAGTACCTGCAAAAATTTTATGCGGAGTGCGA<br>AAAC                                                                                                                                                                                                                                                                                                                                                                                                                                                                                                                                                                                                                                                                                                                                                                                                                                                                                                                                                                                                                                                                                                                                                                                                                                                                                                                                                                                                                                                                                                                                                                                                                                                                                                                                                                                                                                                                                                                                                                                                                                                                                                                                                                                          | MNNSIKFHVSVDGTARA<br>LFNTKEQAEKYCLVEEIN<br>DEMNGYKFKSWEKLR<br>EENCASVQDWVEKNYTS<br>SYSDLFNICEIEVSSAGQL<br>VKIDNTEVDDFVENCYG<br>FTLEDDLEEFNKAKQYL<br>QKFYAECE                                                                                                                                                                                                                                                                                                                                                                                                                                                                                                                                                                                                                                                                                                                                                                                                                                                                                          |
| HpaCas9                | ATGGAAAATAAAAACTTAAATATATCCTTGGTCTCGACCTTGGTATCG<br>CCTCTGTTGGCTGGGCTGTGGTTGAAATGACGAAAAAGAGAATCCTC<br>TGCGTTTAAATTGATGTTGGTGTACGTACTTTGCAACGAGCAGAAAGTGC<br>CCAAAACAGGTGAAAGCCTTGGCGTTTCTCGCCGTTTAGCCCGCTCCG<br>CTCGTCGATTAACCAACGTCGCGTTGCTCGTCTGAAAAAGCAAAAC<br>GACTTCTAAAATCAGAAAATATCTTATTCACCTGATGAACGCTCTTCC<br>TCAATCAAGTTTGGCAGCTACGTGTCGAAGGCTAGATCATAAACTAGAA<br>CGCCAAGAATGGGCTGCTGTGTTATTACATTTAATTAAGCACCGTGGT<br>TATTTATCTCAGCGTAAAAATGAAAGTAAAAGCGAAAAATAAAGAGCTAG<br>GTGCGTTATTAAGCGGTGTAGACAATAATCATAAATTAAGTGCAGCAAGC<br>TACATATCGCTCGCCAGCAGAACTTCCCGTAAAAAATTTGAGGTGCGAA<br>GAAGGTATATCCGTAACCAACAAGGCGCCTATACTCACACGTTTAGCC<br>GACTAGACTTACTCGCCGAAATGGAACCTCCTTCTCTCGTCAACAACA<br>CTTTGGTAATCCATTCGCTTCAGAAAAATTTATAGAAAATTTGACCGCA<br>CTTTAATGTGGCAAAAACCTGCCCTTATCTGGTGAAGCTATTTTAAAAA<br>TGCTCGTAAATGTACTTTTGAAGTAAATATAAAGGCAAGTAAAGAACAC<br>TTATTCGCGCAGAACGTTTGTGTTGGATAACGAAATTAATAATTTACGT<br>ATTCAGAAAATGGCTTAGAGCGTGTCTTAAATGATAATGAACGTTTAG<br>CATTAAATGGAGCAACCTTATGACAAAAATAGATTATTCTATTCAACAGT<br>ACGCTCAATATAAATAATTTGATGAGGCAATCTTTAAAGCCCTCCGT<br>TATTCGCGGTGAGGATAAAAAGGCCATTGAAACTAAAGCAGTACTGATG<br>GAAATGAAAGCCTATCACCAAAATTCGTAAGTATTGGAAGGTAATAACC<br>TAAAAGCTGAATGGGCAGAAATTAAGGCAATCCAACATTATTAGATGA<br>AATTTGGTACGGCATTTCATTATATAAAAAGTAAAGTAAAGTAAAGTAAAG<br>TACTTAGCAGGAAAAGTCTCTCAGCCTGTATTAATAGCCTTATTGGAAA<br>ATCTTAGTTTGGATAAATTTATCCAATATCCCTTAAAGCTTTATATAA<br>ACTTCTACCATTAATGCAACAAGGACTACGCTATGATGAGGCTTGTCTGT<br>GAAATTTATGGCGATCATTATGTAAGTAAAGTAAAGTAAAGTAAAGTAAAG<br>TCTTACCACAGATTCCAGCTGATGAAATCCGTAATCCTGTGGTTTTTACG<br>AACACTCACGCAAGCTCGTAAAGTGATTAATGGCGTAGTGAGATTATAT<br>GGTTCGCGAGCTCGTATTCATATTGAAACGGGACGAGAAGTTGGCAAA<br>TCTTACAAAAGATCGTCTGTAAGTAAAGTAAAGTAAAGTAAAGTAAAGTAAAG<br>AACAGCGTGAACGCAATCAAGGAATTTAAAGAGTACTTCCCTCATT<br>TGCTGGTGGACCTAAAGCCAAAGACATTTTAAAAATGGGACTTTATAAA<br>CAGCAAAATGCAAAATGTTTATATTCGCGCAAAACCTATCGAATTGCACC<br>GTTTATTAGAAAAAGGCTATGTAGAAGTCGATCAGCCTTGGCGTTTT<br>CCCGTACTTGGGATGATGTTTCAACAATAAAGTAAAGTAAAGTAAAGTAAAG<br>ATGAAAATCAAAAACAAAGGCAATTTAACCCCTTTTGAATGGCTTGTATGG<br>TAAACATAACAGCGAACGCTGGAGAGCGTTCAAAGCATTAGTTGAAACC<br>AGTGCAATCCCTTATGCGAAAAACAACGCATCCTAAGCCAAAAACTTG<br>ATGAAAAGGGCTTATTTGAACGTAATTTAAATGATACGCGCTACGTTGC<br>TCGTTTCTTATGTAATTTTATTGCAGATAATATGCACTTAACAGGTGAA<br>GGAAAACGAAAAGTATTTGCTTCCAACGGGCAAAATACCCTTTACTTC<br>GTAGCCGTTGGGATTAGCAAAATCACGGGAAGACAATGACCGCCATC<br>ACGCTTAGATGCGGTTGGTGTGCTTGTCTGCAACCGTCCCATGCAAGC<br>AAAAATCACACGTTTTTGTTCGTTTTTGAAGCTGGTGTGATGATTCACTG<br>GTGAACGAATAGATCGTGAACAGGTGAAATATTCCATTACACTTCCC<br>TACTCCATGGCAATTTTCAACAAGAAGTTGAAATCCGAATTTTATG | MENKNLNYLGLDLGIAS<br>VGWAVVEIDEKENPLRI<br>DVGVRTFERAEVPKTGE<br>SLALSRRLARSARRLTQR<br>RVARLKKAKRLLKSENIL<br>LSTDERLPHQVWQLRVE<br>GLDHHKLERQEWAAVLL<br>HLIKHRGYLSQRKNESK<br>SENKELGALLSGVDNNH<br>KLLQQATYRSPAELAVK<br>KFEVEEGHIRNQGGAYT<br>HTFSRLDLLAEMELLFSR<br>QQHFNGNPFASEKLENT<br>ALLMWQKPAISGEAILK<br>MLGKCTFEDEYKAAKNT<br>YSAERFVWITKLNARIQ<br>ENGLERALNDNERLALM<br>EQPYDKNRLFYSQVRSIL<br>KLSDEAIFKGLRYSGEDK<br>KAJETKAVLMEKAYH<br>QIRKVVLEGNLKAWEAE<br>LKANPTLLDEIGTAFSLY<br>KTDEDISAYLAGKLSQPV<br>LNALLENLSFDKFIQLSLK<br>ALYKLLPLMQQGLRYDE<br>ACREIYGDHYGKKTEEN<br>HHFLPQIPADEIRNPVVL<br>RILTQARKVINGVVRVLY<br>GSPARIHIETGREVGKSY<br>KDRRELEKRQEENRQK<br>RENAIKEFKEYFPFHAGE<br>PKAKDILKMRLYKQNA<br>KCLYSGKPIELHRLLEK<br>YVEVDHALPFSRTWDDS<br>FNNKVLVLANENQNK<br>NLTPFEWLDGKHNSERW<br>RAFALVETSAPFYAKKQ<br>RILSQKLEDEKGFIERNLN<br>DTRYVARFLCNFIADNM<br>HLTGEGKRKVFASNGQI<br>TALLRSRWGLAKSREDN<br>DRHHALDAVVVACSTVA<br>MQQKITRFRVFEAGDVF<br>TGERIDRETGEIPLHPT<br>PWQFQVEVEIRIFSDNP<br>KLELENRLPDRPQANHE<br>FVQPLFVSRMPTRKMTG<br>QGHMETVKSARKLNEGI |

|                |                                                                                                                                                                                                                                                                                                                                                                                                                                                                                                                                                                                                                                                                                                                                                                                                                                                                                                                                                                                                                                                                                                                                                                                                                                                                                                                                                                                                                                                                                                                                                                                                                                                                                                                                                                                                                                                                                                                                                                                                                                                                                                                                                                                                                                                                                                                                                                                                                                                                                                                                                                                                                                                                                                                                                                                                                                                                                                                                                                   |                                                                                                                                                                                                                                                                                                                                                                                                                                                                                                                                                                                                                                                                                                                                                                                                                                                                                                                                                                                                                                                                                                                                                                                                                                                                 |
|----------------|-------------------------------------------------------------------------------------------------------------------------------------------------------------------------------------------------------------------------------------------------------------------------------------------------------------------------------------------------------------------------------------------------------------------------------------------------------------------------------------------------------------------------------------------------------------------------------------------------------------------------------------------------------------------------------------------------------------------------------------------------------------------------------------------------------------------------------------------------------------------------------------------------------------------------------------------------------------------------------------------------------------------------------------------------------------------------------------------------------------------------------------------------------------------------------------------------------------------------------------------------------------------------------------------------------------------------------------------------------------------------------------------------------------------------------------------------------------------------------------------------------------------------------------------------------------------------------------------------------------------------------------------------------------------------------------------------------------------------------------------------------------------------------------------------------------------------------------------------------------------------------------------------------------------------------------------------------------------------------------------------------------------------------------------------------------------------------------------------------------------------------------------------------------------------------------------------------------------------------------------------------------------------------------------------------------------------------------------------------------------------------------------------------------------------------------------------------------------------------------------------------------------------------------------------------------------------------------------------------------------------------------------------------------------------------------------------------------------------------------------------------------------------------------------------------------------------------------------------------------------------------------------------------------------------------------------------------------------|-----------------------------------------------------------------------------------------------------------------------------------------------------------------------------------------------------------------------------------------------------------------------------------------------------------------------------------------------------------------------------------------------------------------------------------------------------------------------------------------------------------------------------------------------------------------------------------------------------------------------------------------------------------------------------------------------------------------------------------------------------------------------------------------------------------------------------------------------------------------------------------------------------------------------------------------------------------------------------------------------------------------------------------------------------------------------------------------------------------------------------------------------------------------------------------------------------------------------------------------------------------------|
|                | <p>GATAATCCTAAACTGGAAGTAGAAAATAGATTGCGGGATCGTCCACAAG<br/> CAAATCATGAATTTGTCCAACCTCTGTTTGTATCTCGAATGCCAACACG<br/> CAAATGACCGGTCAAGGACACATGAAAACCGTAAATCAGCGAAACG<br/> TCTCAATGAAGGGATAAGCGTGATTAAAATGCCACTCACTAAATTA<br/> TTAAAAGATTTAGAATTGATGGTAAATCGTGAACGTGAAAAAGATCTTT<br/> ATGATACTTTAAAAGCTCGTCTAGAGGCTTTTAAATGATGATCCTGCTAA<br/> AGCGTTTGTGTAACCTTTTATAAAAAAAGGTGGGGCTATTGTTAAATCA<br/> GTACGAGTAGAACAAATACAAAAATCTGGCGTATTAGTCCGTGAGGGG<br/> AATGGTGTGCGGATAATGCCTCAATGGTGAGAGTGGATGTATTCACT<br/> AAAGGTGGAATAATTTCCCTTGTGCCAATTTATACCTGGCAAGTCGCTA<br/> AGGGAATTTTACCTAATAAAGCAGCAACACAATATAAAGATGAGGAAGA<br/> TTGGGAAGTGATGGATAACTCTGCAACTTTCAAATTTTCATTACACCCA<br/> AATGACTTAGTAAAATTAGTCACTAAAAAGAAAACCATTTTAGGTTACT<br/> TTAATGGACTTAATCGTGCCACAGGTAATATAGATATTAAAGAATGA<br/> TTTAGATAAATCAAAAAGGGAACAAGGTATTTTTGAAGGTGTTGGTATT<br/> AAATAGCCCTTTCCTTCGAAAAATATCAAGTCGATGAACTTGGA<br/> ATAATTCGTTTATGTAACCAAGTAAACGCCAACCTGTTTCGTTAA</p>                                                                                                                                                                                                                                                                                                                                                                                                                                                                                                                                                                                                                                                                                                                                                                                                                                                                                                                                                                                                                                                                                                                                                                                                                                                                                                                                                                                                                                                                                                                                                                                                                                                                                                                                                                                                                                                                                                                                                                                                             | <p>SVIKMPLTKLKLKLDLEL<br/> MVNREREKDLDYDTLKA<br/> RLEAFNDPAKAFAPFI<br/> KKGGAIVKSVRVEQIQK<br/> SGVLVREGNGVADNASM<br/> VRVDVFTKGGKYFLVPI<br/> YTWQVAKGILPNKAATQ<br/> YKDEEDWEVMDNSATF<br/> KPSLHPNDLVKLVTKKK<br/> TILGYFNLNRATGNIDI<br/> KEHDLDKSKGKQGIFEG<br/> VGIKLALSFEKYQVDELG<br/> KNIRLCKPSKRQPV</p>                                                                                                                                                                                                                                                                                                                                                                                                                                                                                                                                                                                                                                                                                                                                                                                                                                                                                                                                                       |
| <p>SmuCas9</p> | <p>ATGATGATGGAAAAATTTCACTATGTATTGGGTTTGGATTGGGTATC<br/> GCCTCTGTGGGGTGGGCTGCCATTGAAATTGACAAGGAAACCGAAACA<br/> TCAATCGGTTTATTGGATTGCGGTGTCAGAACATTTGAACGTGCAGAA<br/> TACCCCAAACAGCGATTCTCTTGGCAAGCTCCGCGTGAAGCCAGA<br/> AGTACTCGCCGTTTAAATTCGACAGCGTTCGCATCGCTTATTACGTTTA<br/> AAACGTTTATTGAAACGTGAAATTTTCAGGCAGCTGAAACGTTTAAAG<br/> ACTTACCAATCAATGCTTGGCAATTCGCTGTTAAAGGCTTGGATAGTC<br/> GGTTGAATGAATATGAATGAGGCGCGGCTTTTAAATGTCATTGGTGAAGC<br/> ATCGCGGTTATTTATCGCAACGCAAAAGCGAAATGAGCGAAACAGACA<br/> GCAAAATCTGAAATGGGACAGATTACTGGCAGGTGTGGCGGAAAAATCACC<br/> AACTTTTACAACAAGAACAATATCGTACACCAGCCGAATTAGCACTCAA<br/> AAAATTTGTGAAACATTTTCGCAATAAAGGTGGCGATTATGCACACACT<br/> TTCAACCGTTTGGATTGCAAGCCGAATTCATTTATTGTTTCAAAAAC<br/> AACGTGAATTAGGCAATCCATTCACTTCACAGAAATTGGAACGGCAAGT<br/> TGATGATTTGTTGATGACGACGCGAGTGCCTTACAAGGTGATGCGAT<br/> TTTGAATGTTGGGTCATTGGGTTTGAACCTGAACAATTCAAAGC<br/> AGCGAAAAACACATTCAGTGCCGAACGTTTATTTGGTTGACAAAACCTC<br/> ATAATCTTCGCATTCAAGACCAAGGCAAGAAGGTGCGTTAACTGCCG<br/> ATGAGCGTACCAAATTTGTTGGCAGGCTTATAAAAAAAGTAAATGAC<br/> TTACGCACAAGTTTCGCAATTTAAGCTTGCTCAAACCTGCTATTTTT<br/> AAAGGTTTTCGTTATGATTTGGAACATGACAAAAAGCAGAAAAACGTA<br/> CGTTGATGGAATGAAATCCTATCACAAATCCGCCAAACATTGGA<br/> ATCAGGTTTGAACAGAAATGGCAAAGTATTGCCACGCGAGCCTGAAAT<br/> TTAGATGCAATTTGGCAGCGGCTTTCCATTTATAAAACCGATGAAGATA<br/> TTTTCGCATGAATTAAAAACGTCAGGCTGCCTGAAACGTTATTGAATGA<br/> ATTACTGAAAAACATCAATTTTATGATGGATTCAATTATCGTTGACT<br/> GCATTACGCAAAATTTGCCCTTATGGAACAAAGCTACCGTTATGAT<br/> GAAGCGTGTACCAAATTTACGGTAATCATCATTCAGGCAGCTTGAAC<br/> AAGAATGAAAGCAATTTTTCGCACATATTCGGATTGATGATGTCGCA<br/> TCCTGTGGTGTTCCTACTTTGACCAAGCAAGAAAAGTGGTGAATGC<br/> GATTATTCGTGCGTATGGTTCGCCAGCTCGTGTGCATATTGAGATGGC<br/> CGGTGAATTTGGTAAGTCTAAATCAGACCGTGACCGAATGAAAAACAA<br/> CAACAAAAAATAAAAAAGAACGTGAAAACGCGTCCCAAATTCAAAG<br/> AAGATTTCCCTGATTTTGTGGGCGAACCCAGAGGGAAGATATTTTGA<br/> AAATGCGTTTGTATGAACAACAACACGGCAATGTTTGTATTGGGTCA<br/> TGATATTGATATTAATCGATTGAATGAAAAAGGTTATGTTGAAATGAC<br/> CATGCCCTGCCATTTTCACGGACTTGGGATGATGATCAAAATAATAAAG<br/> TTTTGGTACTTGGCAGCGAAAAACAAAATAAACGCAATCAAACGCCTGA<br/> TGAATATTTGGACGGTGCAAACAATAGCCAACGTTGGCTTGAATTTCAA<br/> GCGCGTGTACAACTTGTCAATTTTCTTACGGTAAAAACAACGCATTC<br/> AATTAGCCAAATFAGACGATGAAACCGAAAAAGGATTTTTAGAACGCAA<br/> TCTAAATGATACGCGGTATATTGCTCGTTTTATGTGTCAATTTGTCCAA<br/> GAAAATTTATATTTGACAGGTAAGGAAAACGCTCTTGTTTTTGCATCAA<br/> ACGGCGGAATGACCGCAACATTGAGAAATTTATGGGGTTTGAAGAAAAG<br/> TCCGTGAAGACAACGACCGCCATCATGCTCTTGTATGCGATTGTGGTGG<br/> CGTGTCCACTGCTTCTATGCAACAATAAACAAGCAATTTCAACG<br/> CCATGAAAGCATTGAATATGTGGATACCGAAACGGGCGAAGTAAAATTT<br/> CGTATTCCACAGCCTTGGGATTTTTCCGTCAGGAAGTGAATGATCGT<br/> GTGTTTCAGCGACCAACCGTGTGAAGATTTGGTGAATAAATTTGTCGGCT<br/> CGTCCCAAGCTTTGATGACAAACGTAACCGCTTAAATTTGTCGCGT<br/> GCACCAAAATCGCAAAATGTCGGGGCAAGGGCATTTGAAACCATCAAA<br/> TCTGCAAAAAGGCTGTCTGAAGAAAACAGTATGGTAAAAAACCATTA<br/> CCACATTTGAAATTAAGAATATTCAGAAATCGTAGGCTACCCGAGTGC</p> | <p>MMMEKFHYVLGLDLGLIA<br/> SVGWAAIETDKETETISGL<br/> LDCGVRTFERAEVPKTG<br/> DSLAKARREARSTRRLIR<br/> RRSHRLLRLKRLKREIF<br/> RQPETFKDLINAWQLR<br/> VKGLDSRLNEYEWAVAL<br/> LHLVKHRGYSRKSEM<br/> SETDSKSEMGRLLAGVA<br/> ENHQLLQQEQYRTPAEL<br/> ALKKFVKHFRNKGGDY<br/> AHTFNRLDLQAEHLHLF<br/> QKQRELGNPFTSPELER<br/> QVDDLMTQRSALQGD<br/> AILKMLGHCGFEPEQFK<br/> AAKNTFSAERFIWLTKLN<br/> NLRIQDQKERALTADE<br/> RTKLLDEPYKSKLTYA<br/> QVRKLLSLPQTAFKGLR<br/> YDLEHDKKAENSTLME<br/> MKSYHNIRQTLKESGLK<br/> TEWQSIATQPEILDAIGT<br/> AFSIYKTDEDISHLKT<br/> RLPENLVNELLKNINFDG<br/> FIQLSLALRKLPLMEQ<br/> GYRYDEACTQJYGNHHS<br/> GSLQQESKQFLPHIPIDD<br/> VRNPVVFRTLTQARKVV<br/> NAIIRRYGSPARVHEMA<br/> RELGKSKSDRDRIEKQQ<br/> QKNKKERENAVAKFKE<br/> DFPDFVGEPRGKDILKM<br/> RLPYEQHGKCLYSGHDI<br/> DINRLNEKGYVEIDHALP<br/> FSRTWDDSQNNKVLVLG<br/> SENQNKRNQTPDEYLDG<br/> ANNSQRWLEFQARVQT<br/> CHFSYGKKQRIQLAKLD<br/> DETEKGFLERNLNDTRYI<br/> ARFMCQFVQENLYLTGK<br/> GKRLVFASNGGMTATLR<br/> NLWGLRKYREDNDRHH<br/> ALDAIVVACSTASMQQKI<br/> TKAFQRHESIEYVDTET<br/> GEMKFRIPQPWDFFRQE<br/> VIMRVSDQPCEDLVEK<br/> LSARPEALHDNVTPLFVS<br/> RAPNRKMSGQGHLETIK<br/> SAKRLSEENSMVKKPLT<br/> TLKLDIPEIVGYPSREPO<br/> LYAALKTRLETHDDDP<br/> KAFAPFYKPNKNGELG<br/> ALRVSVRVKGVQNTGV</p> |

|  |                                                                                                                                                                                                                                                                                                                                                                                                                                                                                                                                                                                                                                                                                                             |                                                                                                                                                                                                       |
|--|-------------------------------------------------------------------------------------------------------------------------------------------------------------------------------------------------------------------------------------------------------------------------------------------------------------------------------------------------------------------------------------------------------------------------------------------------------------------------------------------------------------------------------------------------------------------------------------------------------------------------------------------------------------------------------------------------------------|-------------------------------------------------------------------------------------------------------------------------------------------------------------------------------------------------------|
|  | <p>TGAACCTCAATTGTATGCCGCATTGAAAACACGTTTAgAAACGCATGAT<br/>GATGACCCAATTAAAGCCTTTGCCAAACCCTTTTACAAACCCAATAAAA<br/>ATGGTGAATTGGGGGCGTTGGTTCGATCGGTGCGTGTGAAAGGTGTA<br/>CAAAATACGGGTGTAATGGTTCATGATGGCAAAGGCATTGCCGATAAT<br/>GCCACAATGGTTCGTGTGATGTCTATACCAAAGCGGGCAAAAATTAC<br/>CTTGTTCCCTGTGTATGTTGGCAGGTGGCTCAAGGAATTTGCCAAAT<br/>CGGGCGGTTACTTCTGGCAAAAGTGAAGCAGATTGGGATTTAATTGAT<br/>GAAAGTTTTGAATTTAAATTTTCGCTGTCTCGTGGGGATTTAGTGGA<br/>ATGATTAGCAATAAAGGAAGAATTTTGGTTATFACAATGGGTTAGATC<br/>GTGCAAAATGGAAGTATGGGATTCGTGAACATGATTTGAAAAAGTCCA<br/>AAGGAAAAGATGGTGTTCATCGTGTGGCGTGAAAACCGCCACCGCAT<br/>TCAACAAATACCACGTTGACCCACTTGGTAAAGAAATTCATCGGTGTT<br/>ATCTGAACCACGCCCCACATTAATAATCAAATCCAAGAAATAA</p> | <p>MVHDGKGIADNATMVR<br/>VDVYTKAGKNYLVPVYV<br/>WQVAQGILPNRAVTSBK<br/>SEADWDLIDESFEKFSLS<br/>RGDLVEMISNKGRIFGYY<br/>NGLDRANGSIGIREHDL<br/>KSKGKDVHRVGVKTA<br/>TAFNKYHVDPLGKEIHR<br/>CSSEPRPTLKIKSKK</p> |
|--|-------------------------------------------------------------------------------------------------------------------------------------------------------------------------------------------------------------------------------------------------------------------------------------------------------------------------------------------------------------------------------------------------------------------------------------------------------------------------------------------------------------------------------------------------------------------------------------------------------------------------------------------------------------------------------------------------------------|-------------------------------------------------------------------------------------------------------------------------------------------------------------------------------------------------------|
