# Supplementary material for: Potent Cas9 Inhibition in Bacterial and Human Cells by AcrIIC4 and AcrIIC5 Anti-CRISPR Proteins
Source: PubMed Central journal article supplement (PMC6282205; doi:10.1128/mbio.02321-18), 2018-12-04
Supplement: mbo006184201st2.pdf [file mbo006184201st2.pdf]

**Supplementary Table 2:** AcrIIC5<sub>Smu</sub> homolog % identities.

|                                | AcrIIC5 <sub>Smu</sub> | AcrIIC5 <sub>Nzo</sub> | AcrIIC5 <sub>N10023</sub> | AcrIIC5 <sub>N95_16</sub> | AcrIIC5 <sub>Nwa</sub> |
|--------------------------------|------------------------|------------------------|---------------------------|---------------------------|------------------------|
| <i>S. muelleri</i>             | 100                    |                        |                           |                           |                        |
| <i>N. zoodegmatidis</i>        | 28                     | 100                    |                           |                           |                        |
| <i>Neisseria</i> sp. 10023     | 30                     | 75                     | 100                       |                           |                        |
| <i>Neisseria</i> sp.<br>N95_16 | 27                     | 72                     | 84                        | 100                       |                        |
| <i>N. wadsworthii</i>          | 25                     | 47                     | 51                        | 50                        | 100                    |
