# Supplementary material for: Potent Cas9 Inhibition in Bacterial and Human Cells by AcrIIC4 and AcrIIC5 Anti-CRISPR Proteins
Source: PubMed Central journal article supplement (PMC6282205; doi:10.1128/mbio.02321-18), 2018-12-04
Supplement: mbo006184201st3.pdf [file mbo006184201st3.pdf]

**Supplementary Table 3:** Pairwise percent protein identities between type II-C Cas9 orthologs.

|         | # of amino acids | NmeCas9 | SmuCas9 | HpaCas9 | GeoCas9 | CjeCas9 |
|---------|------------------|---------|---------|---------|---------|---------|
| NmeCas9 | 1,082            | 100     |         |         |         |         |
| SmuCas9 | 1,063            | 62      | 100     |         |         |         |
| HpaCas9 | 1,049            | 59      | 55      | 100     |         |         |
| GeoCas9 | 1,087            | 39      | 39      | 40      | 100     |         |
| CjeCas9 | 984              | 32      | 31      | 32      | 32      | 100     |
