# Supplementary material for: Potent Cas9 Inhibition in Bacterial and Human Cells by AcrIIC4 and AcrIIC5 Anti-CRISPR Proteins
Source: PubMed Central journal article supplement (PMC6282205; doi:10.1128/mbio.02321-18), 2018-12-04
Supplement: mbo006184201st4.pdf [file mbo006184201st4.pdf]

**Supplementary Table 4:** Strains and plasmids used in this study.

| <b>Bacterial strains</b>                                           | <b>Source</b>                         |
|--------------------------------------------------------------------|---------------------------------------|
| <i>Escherichia coli</i> Rosetta (DE3)                              | Thermo Fisher Scientific              |
| <i>Escherichia coli</i> B121                                       | A. Davidson Lab                       |
| <i>Escherichia coli</i> BB101                                      | A. Davidson Lab                       |
| <b>Plasmids for protein purification and binding assays</b>        |                                       |
| pEJS658 pMCSG7-AcrE2                                               | This study                            |
| pEJS659 pMCSG7-AcrIIC1Boe                                          | This study                            |
| pEJS660 pMCSG7-AcrIIC1Nme                                          | This study                            |
| pEJS661 pMCSG7-AcrIIC2Nme                                          | This study                            |
| pEJS662 pMCSG7-AcrIIC3Nme                                          | This study                            |
| pEJS663 pMCSG7-AcrIIC4Hpa                                          | This study                            |
| pEJS664 pMCSG7-AcrIIC5Smu                                          | This study                            |
| pEJS1026 pMCSG7-HpaCas9                                            | This study                            |
| pEJS1027 pMCSG7-SmuCas9                                            | This study                            |
| pEJS973 pMCSG7-NmeCas9                                             | This study                            |
| pCDF-ACRE2                                                         | A. Davidson Lab                       |
| pCDF-ACRIIC1Nme                                                    | A. Davidson Lab                       |
| pCDF-ACRIIC4Hpa                                                    | This study                            |
| pCDF-ACRIIC5Smu                                                    | This study                            |
| <b>Plasmids expressing Cas9/sgRNA for phage Mu targeting assay</b> |                                       |
| pBG_GeoCas9sgRNAMu                                                 | Harrington et al., <i>Cell</i> , 2017 |
| pBG_HpaCas9sgRNAMu                                                 | This study                            |
| pBG_NmeCas9sgRNAMu                                                 | A. Davidson Lab                       |
| pBG_CjeCas9sgRNAMu                                                 | A. Davidson Lab                       |
| <b>Plasmids for mammalian genome editing</b>                       |                                       |
| pEJS540 pCSDest2-AcrIIC4-Hpa                                       | This study                            |
| pEJS542 pCSDest2-AcrIIC5-Smu                                       | This study                            |
| pEJS581 pCSDest2-AcrIIC4Hpa-FLAG-NLS                               | This study                            |
| pEJS583 pCSDest2-AcrIIC5Smu-FLAG-NLS                               | This study                            |
| pEJS24 pCSDest2-SpyCas9-NLS-3XHA-NLS                               | Addgene # 69220                       |
| pEJS424 pCSDest2-NmeCas9-NLS-3XHA-NLS                              | Addgene #87448                        |
| pEJS427 pCSDest2-AcrE2                                             | Addgene # 85677                       |
| pEJS430 pCSDest2-AcrIIC1Boe                                        | Addgene #85678                        |
| pEJS433 pCSDest2-AcrIIC1Nme                                        | Addgene #85679                        |
| pEJS436 pCSDest2-AcrIIC2Nme                                        | Addgene #85712                        |
| pEJS443 pCSDest2-AcrIIC3Nme                                        | Addgene #85713                        |
| pEJS333 pLKO.1-puro U6 Nme-sgRNA BfuAI stuffer                     | Addgene # 86195                       |
| pEJS334 pLKO.1-puro U6 Spy-sgRNA BfuAI stuffer                     | Addgene # 52628                       |
| pEJS15 pSimpleII-NmeCas9-sgRNA/Empty                               | E. Sontheimer Lab                     |
| <b>Plasmids for fluorescence imaging</b>                           |                                       |

|         |                                                        |                 |
|---------|--------------------------------------------------------|-----------------|
| pEJS333 | pLKO.1-puro U6 Nme-sgRNA BfuAI stuffer                 | Addgene # 86195 |
| pEJS334 | pLKO.1-puro U6 Spy-sgRNA BfuAI stuffer                 | Addgene # 52628 |
| pEJS466 | pHAGE-TO-Nme dCas9-3xGFP                               | Addgene #64109  |
| pEJS467 | pHAGE-TO-Spy dCas9-3xmCherry                           | Addgene #64108  |
| pEJS468 | pLKO.1-NmeSgRNA/DTS13-Telomere                         | Addgene #85714  |
| pEJS469 | pLKO.1-SpySgRNA/DTS13-Telomere                         | Addgene #85715  |
| pEJS476 | pHAGE-TO-Nme dCas9 3XGFP-SgRNA/Telomere-All-in-one     | Addgene #85716  |
| pEJS477 | pHAGE-TO-Spy dCas9 3XmCherry-SgRNA/Telomere-All-in-one | Addgene #85717  |
| pEJS507 | pCSDest2-noAcr-mTagBFP2-IRES                           | Addgene #85748  |
| pEJS481 | pCSDest2-AcrE2-mTagBFP2-IRES                           | Addgene #85749  |
| pEJS482 | pCSDest2-AcrIIC3Nme-mTagBFP2-IRES                      | Addgene #85750  |
| pEJS592 | pCSDest2-AcrIIC4Hpa-BFPv2-IRES                         | This study      |
| pEJS593 | pCSDest2-AcrIIC5Smu-BFPv2-IRES                         | This study      |
